# Supplementary material
Source: Springer Nature journal article supplement (https://www.springermedizin.de/resource/supplementary/12904_2013_180_MOESM1_ESM.pdf/9517710)

5,743 citations

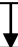

≈ 400 abstracts

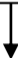

≈ 100 full text articles

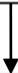

7 articles

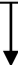

4 unique studies

Supplement: MOESM1 [file 9517710]
